# Supplementary material for: PD-1/PD-L1 inhibitor plus chemotherapy versus bevacizumab plus chemotherapy in first-line treatment for non-squamous non-small-cell lung cancer
Source: PubMed Central journal article supplement (PMC8576478; doi:10.1136/jitc-2021-003431), 2021-11-08

**Additional file 2 Figure S1**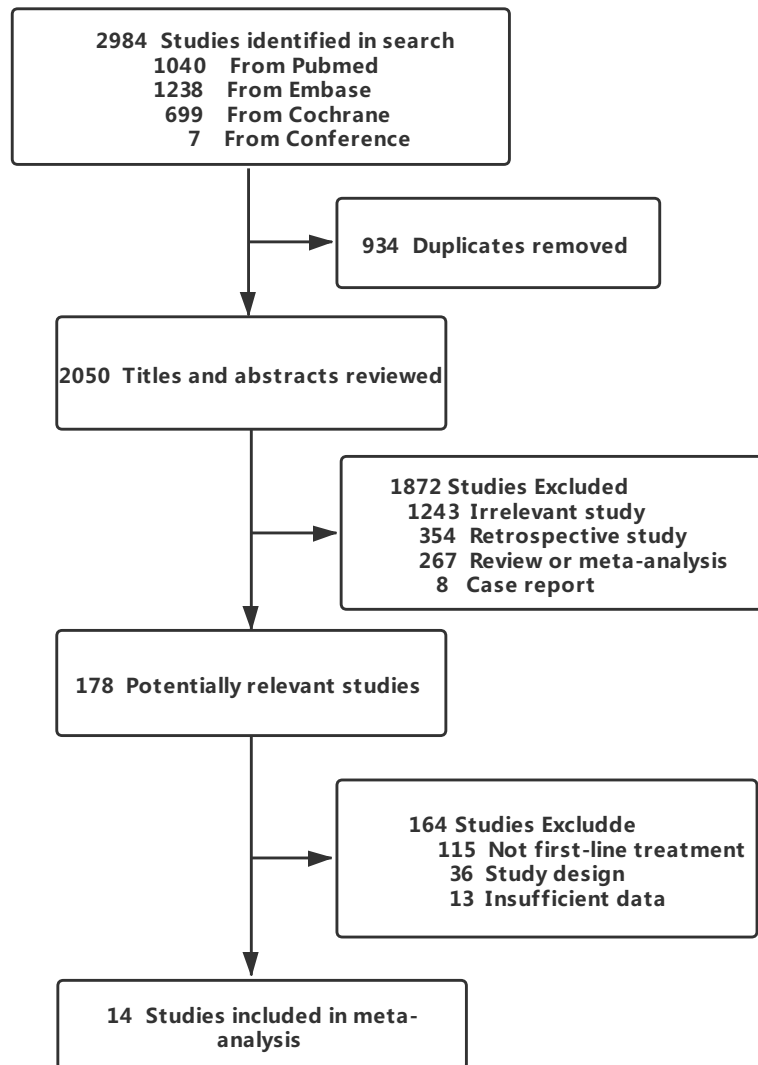

Supplement: jitc-2021-003431supp002.pdf [file jitc-2021-003431supp002.pdf]
