# Supplementary material for: PD-1/PD-L1 inhibitor plus chemotherapy versus bevacizumab plus chemotherapy in first-line treatment for non-squamous non-small-cell lung cancer
Source: PubMed Central journal article supplement (PMC8576478; doi:10.1136/jitc-2021-003431), 2021-11-08
Supplement: jitc-2021-003431supp003.pdf [file jitc-2021-003431supp003.pdf]

**Additional file 3 Table S1.** Quality assessment by Cochrane Collaboration's tool.

| Trial                         | Sequence generation | Allocation concealment        | Blinding              | Incomplete outcome data | Selective reporting | Other source of bias |
|-------------------------------|---------------------|-------------------------------|-----------------------|-------------------------|---------------------|----------------------|
| ECOG4599 <sup>[1]</sup>       | Adequate            | Not clear                     | Adequate <sup>a</sup> | Adequate                | Adequate            |                      |
| JO19907 <sup>[2]</sup>        | Adequate            | Not clear                     | Adequate <sup>a</sup> | Adequate                | Adequate            |                      |
| AVAIL <sup>[3]</sup>          | Adequate            | Adequate (Central allocation) | Adequate <sup>a</sup> | Adequate                | Adequate            |                      |
| PRONOUNCE <sup>[4]</sup>      | Adequate            | Not clear                     | Adequate <sup>a</sup> | Adequate                | Adequate            |                      |
| ERACLE <sup>[5]</sup>         | Adequate            | Adequate (Central allocation) | Adequate <sup>a</sup> | Adequate                | Adequate            |                      |
| BEYOND <sup>[6]</sup>         | Adequate            | Adequate (Central allocation) | Adequate <sup>a</sup> | Adequate                | Adequate            |                      |
| KEYNOTE-189 <sup>[7]</sup>    | Adequate            | Adequate (Central allocation) | Adequate <sup>a</sup> | Adequate                | Adequate            |                      |
| KEYNOTE-021 <sup>[8]</sup>    | Adequate            | Adequate (Central allocation) | Adequate <sup>a</sup> | Adequate                | Adequate            |                      |
| IMpower130 <sup>[9]</sup>     | Adequate            | Adequate (Central allocation) | Adequate <sup>a</sup> | Adequate                | Adequate            |                      |
| IMpower132 <sup>[10]</sup>    | Adequate            | Not clear                     | Adequate <sup>a</sup> | Adequate                | Adequate            |                      |
| CheckMate 227 <sup>[11]</sup> | Adequate            | Adequate (Central allocation) | Adequate <sup>a</sup> | Adequate                | Adequate            |                      |
| CAMEL <sup>[12]</sup>         | Adequate            | Not clear                     | Adequate <sup>a</sup> | Adequate                | Adequate            |                      |
| RATIONALE 304 <sup>[13]</sup> | Adequate            | Adequate (Central allocation) | Adequate <sup>a</sup> | Inadequate <sup>b</sup> | Adequate            |                      |
| ORIENT 11 <sup>[14]</sup>     | Adequate            | Adequate (Central allocation) | Adequate <sup>a</sup> | Adequate                | Adequate            |                      |

a: The sponsor, investigator and subject were aware of the treatment administration but the response to treatment was assessed by means of blinded, independent, central radiologic review.

b: Absence of data of OS.

## Reference

- Sandler A, Gray R, Perry M, Brahmer J, Schiller J, Dowlati A, Lilenbaum R, Johnson D: **Paclitaxel-carboplatin alone or with bevacizumab for non-small-cell lung cancer.** *The New England journal of medicine* 2006, **355**(24):2542-2550.
- Niho S, Kunitoh H, Nokihara H, Horai T, Ichinose Y, Hida T, Yamamoto N, Kawahara M, Shinkai T, Nakagawa K *et al*: **Randomized phase II study of first-line carboplatin-paclitaxel with or without bevacizumab in Japanese patients with advanced non-squamous non-small-cell lung cancer.** *Lung cancer (Amsterdam, Netherlands)* 2012, **76**(3):362-367.
- Reck M, von Pawel J, Zatloukal P, Ramlau R, Gorbounova V, Hirsh V, Leigh N, Mezger J, Archer V, Moore N *et al*: **Phase III trial of cisplatin plus gemcitabine with either placebo or bevacizumab as first-line therapy for nonsquamous non-small-cell lung cancer: AVAIL.** *Journal of clinical oncology : official journal of the American Society of Clinical Oncology* 2009, **27**(8):1227-1234.
- Zinner R, Obasaju C, Spigel D, Weaver R, Beck J, Waterhouse D, Modiano M, Hrinchenko B, Nikolinakos P, Liu J *et al*: **PRONOUNCE: randomized, open-label, phase III study of first-line pemetrexed + carboplatin followed by maintenance pemetrexed versus paclitaxel + carboplatin + bevacizumab followed by maintenance bevacizumab in patients with advanced nonsquamous non-small-cell lung cancer.** *Journal of thoracic oncology : official publication of the*

- International Association for the Study of Lung Cancer* 2015, **10**(1):134-142.
5. Galetta D, Cinieri S, Pisconti S, Gebbia V, Morabito A, Borsellino N, Maiello E, Febbraro A, Catino A, Rizzo P *et al*: **Cisplatin/Pemetrexed Followed by Maintenance Pemetrexed Versus Carboplatin/Paclitaxel/Bevacizumab Followed by Maintenance Bevacizumab in Advanced Nonsquamous Lung Cancer: The GOIM (Gruppo Oncologico Italia Meridionale) ERACLE Phase III Randomized Trial.** *Clinical lung cancer* 2015, **16**(4):262-273.
  6. Zhou C, Wu Y, Chen G, Liu X, Zhu Y, Lu S, Feng J, He J, Han B, Wang J *et al*: **BEYOND: A Randomized, Double-Blind, Placebo-Controlled, Multicenter, Phase III Study of First-Line Carboplatin/Paclitaxel Plus Bevacizumab or Placebo in Chinese Patients With Advanced or Recurrent Nonsquamous Non-Small-Cell Lung Cancer.** *Journal of clinical oncology : official journal of the American Society of Clinical Oncology* 2015, **33**(19):2197-2204.
  7. Gandhi L, Rodríguez-Abreu D, Gadgeel S, Esteban E, Felip E, De Angelis F, Domine M, Clingan P, Hochmair M, Powell S *et al*: **Pembrolizumab plus Chemotherapy in Metastatic Non-Small-Cell Lung Cancer.** *The New England journal of medicine* 2018, **378**(22):2078-2092.
  8. Langer C, Gadgeel S, Borghaei H, Papadimitrakopoulou V, Patnaik A, Powell S, Gentzler R, Martins R, Stevenson J, Jalal S *et al*: **Carboplatin and pemetrexed with or without pembrolizumab for advanced, non-squamous non-small-cell lung cancer: a randomised, phase 2 cohort of the open-label KEYNOTE-021 study.** *The Lancet Oncology* 2016, **17**(11):1497-1508.
  9. West H, McCleod M, Hussein M, Morabito A, Rittmeyer A, Conter H, Kopp H, Daniel D, McCune S, Mekhail T *et al*: **Atezolizumab in combination with carboplatin plus nab-paclitaxel chemotherapy compared with chemotherapy alone as first-line treatment for metastatic non-squamous non-small-cell lung cancer (IMpower130): a multicentre, randomised, open-label, phase 3 trial.** *The Lancet Oncology* 2019, **20**(7):924-937.
  10. Nishio M, Barlesi F, West H, Ball S, Bordoni R, Cobo M, Longeras PD, Goldschmidt J, Jr., Novello S, Orlandi F *et al*: **Atezolizumab Plus Chemotherapy for First-Line Treatment of Nonsquamous NSCLC: Results From the Randomized Phase 3 IMpower132 Trial.** *J Thorac Oncol* 2021, **16**(4):653-664.
  11. Hellmann M, Paz-Ares L, Bernabe Caro R, Zurawski B, Kim S, Carcereny Costa E, Park K, Alexandru A, Lupinacci L, de la Mora Jimenez E *et al*: **Nivolumab plus Ipilimumab in Advanced Non-Small-Cell Lung Cancer.** *The New England journal of medicine* 2019, **381**(21):2020-2031.
  12. Zhou C, Chen G, Huang Y, Zhou J, Lin L, Feng J, Wang Z, Shu Y, Shi J, Hu Y *et al*: **Camrelizumab plus carboplatin and pemetrexed versus chemotherapy alone in chemotherapy-naïve patients with advanced non-squamous non-small-cell lung cancer (CAMEL): a randomised, open-label, multicentre, phase 3 trial.** *The Lancet Respiratory medicine* 2021, **9**(3):305-314.
  13. Lu S, Wang J, Yu Y, Yu X, Hu Y, Ai X, Ma Z, Li X, Zhuang W, Liu Y *et al*: **Tislelizumab Plus Chemotherapy as First-Line Treatment for Locally Advanced or Metastatic Nonsquamous NSCLC (RATIONALE 304): A Randomized Phase 3 Trial.** *Journal of thoracic oncology : official publication of the International Association for the Study of Lung Cancer* 2021.
  14. Yang Y, Wang Z, Fang J, Yu Q, Han B, Cang S, Chen G, Mei X, Yang Z, Ma R *et al*: **Efficacy and Safety of Sintilimab Plus Pemetrexed and Platinum as First-Line Treatment for Locally Advanced or Metastatic Nonsquamous NSCLC: a Randomized, Double-Blind, Phase 3 Study (Oncology pRogram by InnovENT anti-PD-1-11).** *J Thorac Oncol* 2020, **15**(10):1636-1646.
