# Supplementary material for: PD-1/PD-L1 inhibitor plus chemotherapy versus bevacizumab plus chemotherapy in first-line treatment for non-squamous non-small-cell lung cancer
Source: PubMed Central journal article supplement (PMC8576478; doi:10.1136/jitc-2021-003431), 2021-11-08

## Additional file 4 Figure S2

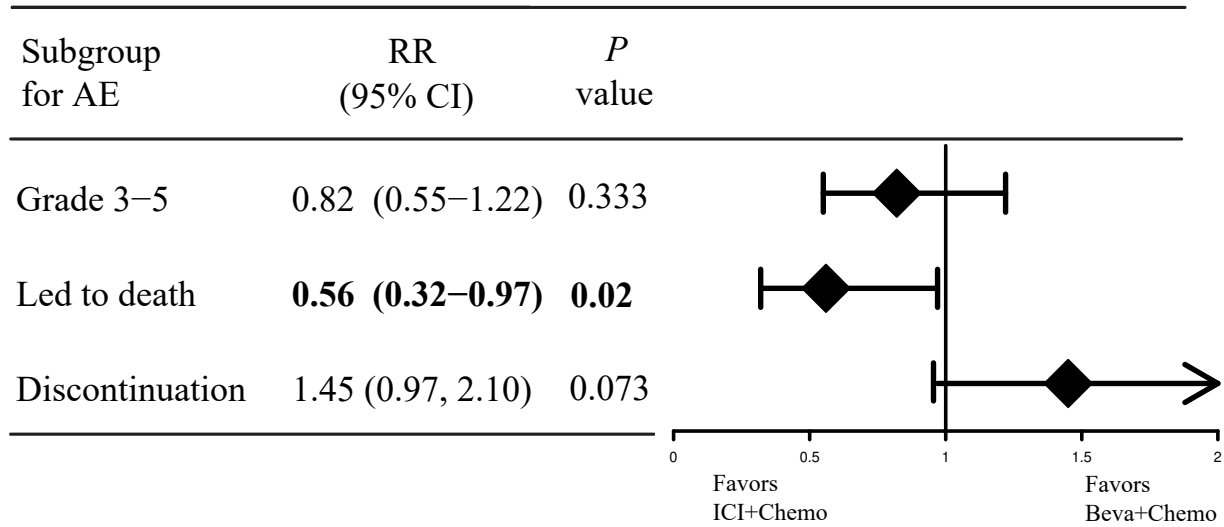

Supplement: jitc-2021-003431supp004.pdf [file jitc-2021-003431supp004.pdf]
